# Supplementary material
Source: PubMed Central journal article supplement (PMC9205967)
Supplement: 41598_2022_14391_MOESM1_ESM.pdf [file 41598_2022_14391_MOESM1_ESM.pdf]

# Scientific Reports

## Supplementary materials

***In vitro* and *in vivo* Antimalarial Activity and Chemical Profiling of**

**Sugarcane Leaves**

Jude E. Okokon<sup>1,\*</sup>, Rebecca Mobley<sup>2</sup>, Utibe A. Edem<sup>3</sup>, Augustine I. Bassey<sup>3</sup>, Idowu

Fadayomi<sup>4</sup>, Falko Drijfhout<sup>5</sup>, Paul Horrocks<sup>2</sup>, Wen-Wu Li<sup>4,\*</sup>

**Table S1:** GC-MS analysis of DCM fraction of *S. officinarum* after TMSi derivation

| PEAK      | RT (min) | COMPOUND NAME                                  | FORMULA                                           | MOL. MASS |
|-----------|----------|------------------------------------------------|---------------------------------------------------|-----------|
| <b>1.</b> | 7.645    | Hexadecanoic acid, trimethylsilyl ester        | C <sub>19</sub> H <sub>40</sub> O <sub>2</sub> Si | 328.28    |
| <b>2.</b> | 17.795   | n-Octacosane                                   | C <sub>28</sub> H <sub>58</sub>                   | 394.45    |
| <b>3.</b> | 17.864   | beta-Sitosterol trimethylsilyl ether           | C <sub>32</sub> H <sub>58</sub> OSi               | 486.43    |
| <b>4.</b> | 19.364   | Propanoic acid, 3,3'-thiobis-, didodecyl ester | C <sub>30</sub> H <sub>58</sub> O <sub>4</sub> S  | 514.41    |

**Table S2:** GC-MS analysis of the total crude extract of *S. officinarum* after TMSi derivation.

| PEAK       | RT     | COMPOUND NAME                                                 | FORMULA                                                         | MOL. MASS |
|------------|--------|---------------------------------------------------------------|-----------------------------------------------------------------|-----------|
| <b>1.</b>  | 7.645  | Hexadecanoic acid, trimethylsilyl ester                       | C <sub>19</sub> H <sub>40</sub> O <sub>2</sub> Si               | 328.28    |
| <b>2.</b>  | 8.840  | Silane, [(3,7,11,15-tetramethyl-2-hexadecenyl)oxy]trimethyl-  | C <sub>23</sub> H <sub>48</sub> OSi                             | 368.35    |
| <b>3.</b>  | 8.829  | Silane, trimethyl[[5-methyl-2-(1-methylethyl)cyclohexyl]oxy]- | C <sub>13</sub> H <sub>28</sub> OSi                             | 228.19    |
| <b>4.</b>  | 9.190  | 11-trans-Octadecenoic acid, trimethylsilyl ester              | C <sub>21</sub> H <sub>42</sub> O <sub>2</sub> Si               | 354.30    |
| <b>5.</b>  | 9.383  | Octadecanoic acid, trimethylsilyl ester                       | C <sub>21</sub> H <sub>44</sub> O <sub>2</sub> Si               | 356.31    |
| <b>6.</b>  | 13.927 | D-(+)-Trehalose, octakis(trimethylsilyl) ether                | C <sub>36</sub> H <sub>86</sub> O <sub>11</sub> Si <sub>8</sub> | 918.43    |
| <b>7.</b>  | 14.164 | Squalene                                                      | C <sub>30</sub> H <sub>50</sub>                                 | 410.39    |
| <b>8.</b>  | 17.526 | Ergosta-7-en-3β-ol                                            | C <sub>31</sub> H <sub>56</sub> OSi                             | 472.41    |
| <b>9.</b>  | 17.762 | Stigmasterol trimethylsilyl ether                             | C <sub>32</sub> H <sub>56</sub> OSi                             | 484.41    |
| <b>10.</b> | 18.270 | beta-Sitosterol trimethylsilyl ether                          | C <sub>32</sub> H <sub>58</sub> OSi                             | 486.43    |

**Table S3:** GC-MS analysis of *n*-hexane fraction of *S. officinarum*.

| PEAK       | RT (min) | COMPOUND NAME                                                              | FORMULA                                           | MOL. wt |
|------------|----------|----------------------------------------------------------------------------|---------------------------------------------------|---------|
| <b>1.</b>  | 3.560    | Phenol, 2,4-bis(1,1-dimethylethyl)-                                        | C <sub>14</sub> H <sub>22</sub> O                 | 206.17  |
| <b>2.</b>  | 5.761    | Tetradecanoic acid                                                         | C <sub>14</sub> H <sub>28</sub> O <sub>2</sub>    | 228.21  |
| <b>3.</b>  | 5.919    | Bicyclo[3.1.1]heptane, 2,6,6-trimethyl-, [1R-(1.alpha.,2.beta.,5.alpha.)]- | C <sub>10</sub> H <sub>18</sub>                   | 138.14  |
| <b>4.</b>  | 6.291    | 3,7,11,15-Tetramethyl-2-hexadecen-1-ol                                     | C <sub>20</sub> H <sub>40</sub> O                 | 296.31  |
| <b>5.</b>  | 7.194    | <i>n</i> -Hexadecanoic acid                                                | C <sub>16</sub> H <sub>32</sub> O <sub>2</sub>    | 256.24  |
| <b>6.</b>  | 7.713    | Hexadecanoic acid, trimethylsilyl ester                                    | C <sub>19</sub> H <sub>40</sub> O <sub>2</sub> Si | 328.28  |
| <b>7.</b>  | 8.829    | ( <i>Z,Z</i> )-9,12-Octadecadienoic acid                                   | C <sub>18</sub> H <sub>32</sub> O <sub>2</sub>    | 280.24  |
| <b>8.</b>  | 12.348   | Bis(2-ethylhexyl) phthalate                                                | C <sub>24</sub> H <sub>38</sub> O <sub>4</sub>    | 390.28  |
| <b>9.</b>  | 14.175   | Squalene                                                                   | C <sub>30</sub> H <sub>50</sub>                   | 410.39  |
| <b>10.</b> | 16.522   | dl-alpha-Tocopherol                                                        | C <sub>29</sub> H <sub>50</sub> O <sub>2</sub>    | 430.38  |
| <b>11.</b> | 18.247   | beta-Sitosterol                                                            | C <sub>29</sub> H <sub>50</sub> O                 | 414.39  |
| <b>12.</b> | 18.907   | D:C-Friedo-B':A'-neogammacer-9(11)-ene, 3-methoxy-, (3.beta.)-             | C <sub>31</sub> H <sub>52</sub> O                 | 440.40  |
| <b>13.</b> | 20.706   | Propanoic acid, 3,3'-thiobis-, didodecyl                                   | C <sub>30</sub> H <sub>58</sub> O <sub>4</sub> S  | 514.41  |

**Table S4:** GC-MS analysis of the ethyl acetate fraction of *S. officinarum*

| PEAK      | RT     | COMPOUND NAME                                  | FORMULA                                          | MOL. MASS |
|-----------|--------|------------------------------------------------|--------------------------------------------------|-----------|
| <b>1.</b> | 19.330 | Propanoic acid, 3,3'-thiobis-, didodecyl ester | C <sub>30</sub> H <sub>58</sub> O <sub>4</sub> S | 514.41    |

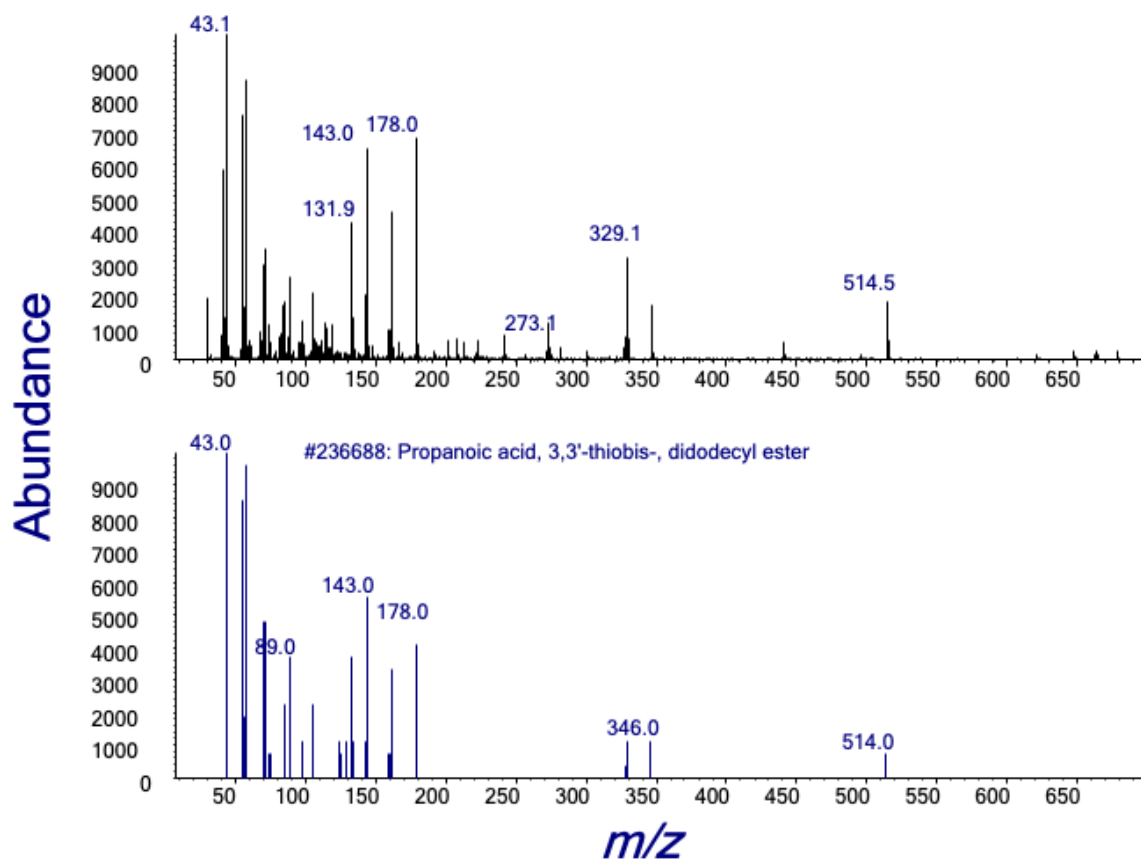

**Figure S1:** Comparison of GC-Mass spectrum of dilauryl thiodipropionate (**4**) (top) from DCM fraction of *S. officinarum* with that of dilauryl thiodipropionate in NIST library (bottom).

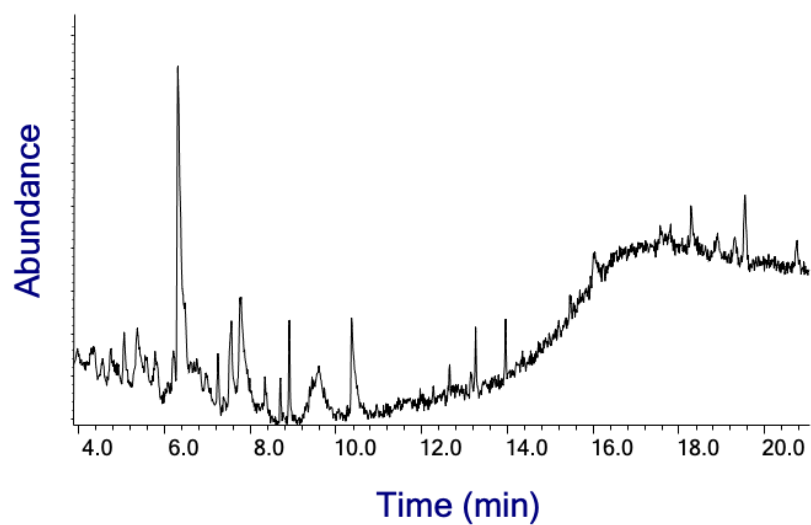

**Figure S2:** GC-MS chromatogram of *n*-butanol fraction of *Saccharum officinarum* (SO) after TMSi derivation.

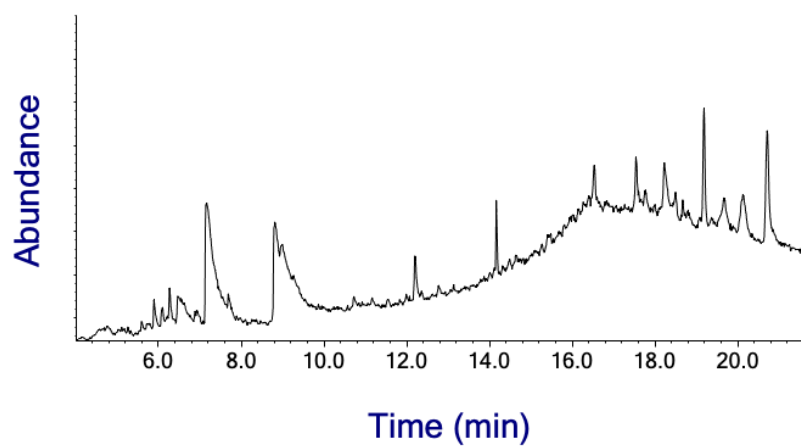

**Figure S3:** GC-MS chromatogram of *n*-hexane fraction of *Saccharum officinarum*.

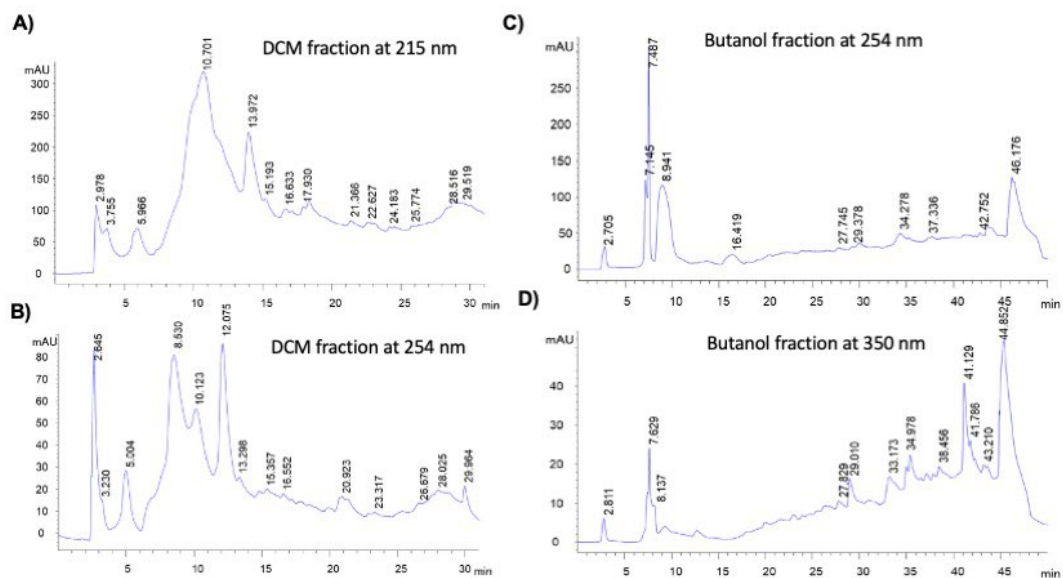

**Figure S4:** Analytical HPLC profile of the DCM fraction of Sugarcane leaf extracts at wavelength of 215 nm (A), 254 nm (B); and the butanol fraction at 254 nm (C) and 350 nm (D).

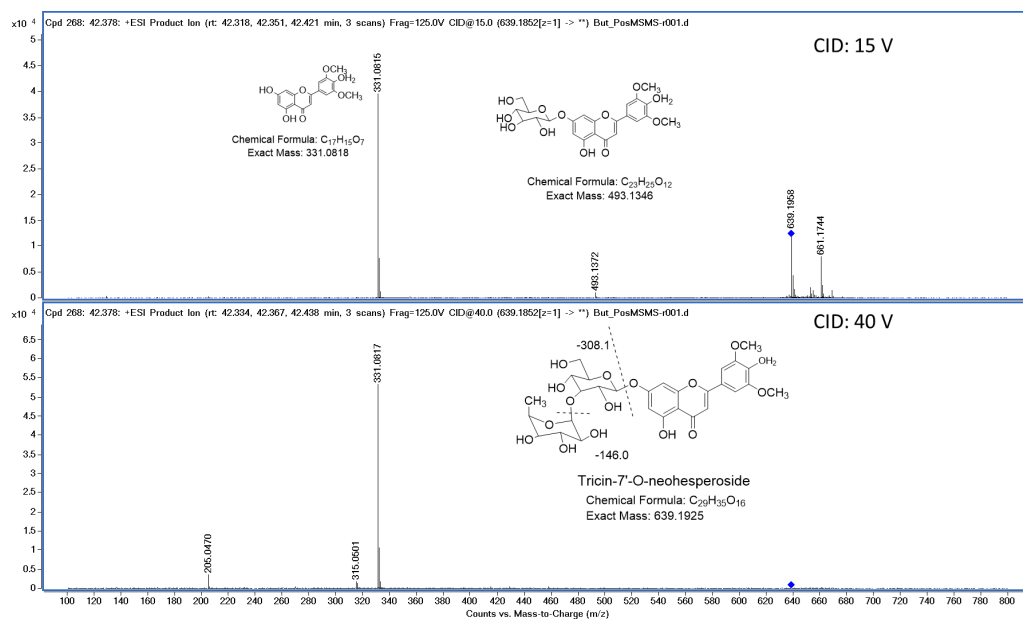

**Figure S5.** LC-TOF-(positive mode) MS/MS spectrum of triclin-7-O-eohesperoside from the butanol fraction of sugarcane leaf extracts. CID-MS/MS spectra (15V, top; 40 V bottom) of mass 639.1852  $[M+H]^+$  indicating a major common fragment ion at  $m/z$  331.0817 through the loss of rhamnose and glucose, and a minor ion at  $m/z$  493.1372 through the loss of rhamnose (-146) at 15 V.

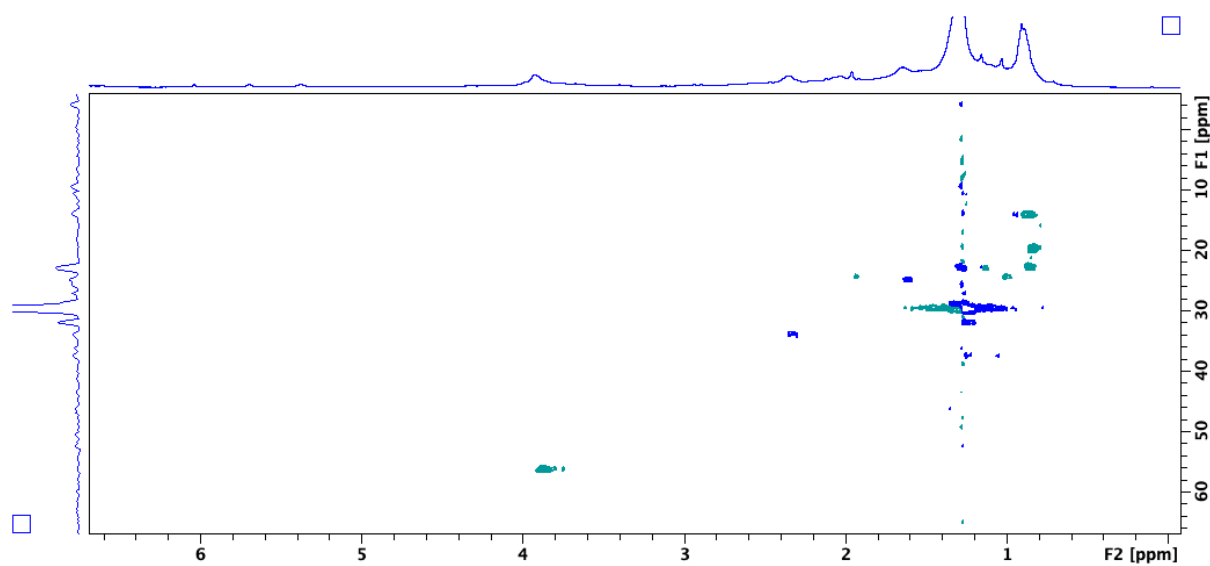

**Figure S6.** HSQC of DCM fraction ( $\text{CDCl}_3$ ) indicating the presence of long chain of fatty acids and methoxy groups.

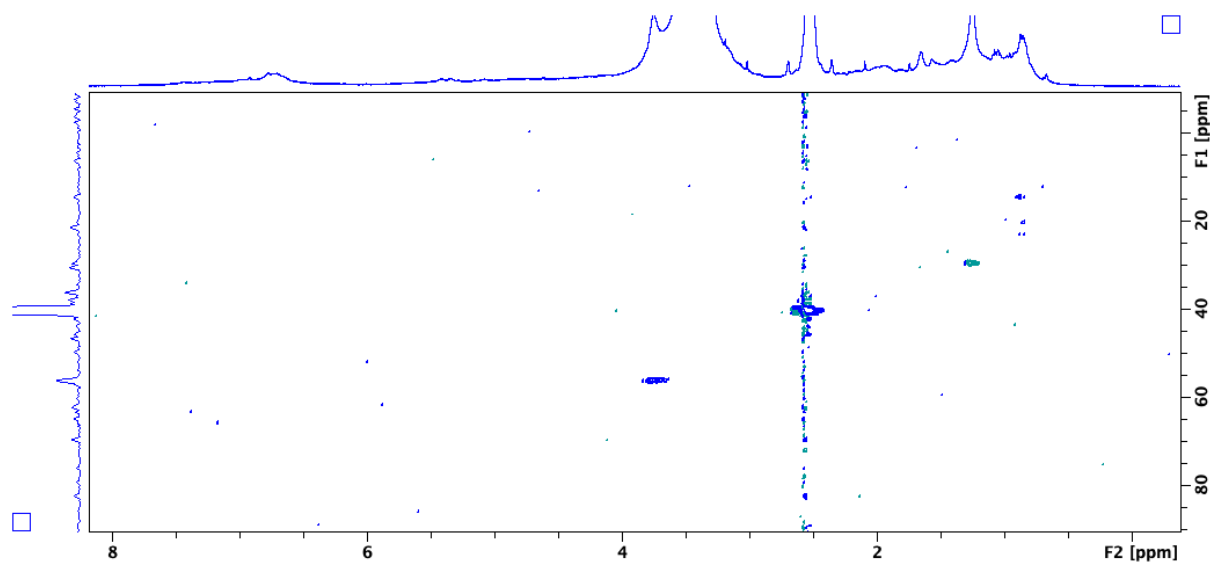

**Figure S7.** HSQC of the butanol fraction ( $\text{DMSO-d}_6$ ) indicating the presence of methoxy groups likely from the flavonoids such as triclin-7-O-neohesperidoside and 3,4',5,6,7-pentamethoxyflavone.
